# Supplementary material for: A P2P multi-path routing algorithm based on Skyline operator for data aggregation in IoMT environments
Source: PeerJ journal article supplement (doi:10.7717/peerj-cs.1682), 2023-11-22
Supplement: Implementation.zip [file Implementation.zip]

## Sheet: Figure9
Nodes Number	LOADng	LRRE	Proposition
20	0.9	1.25	1.3
40	1.1	1.6	1.62
60	1.2	1.78	1.86
80	1.45	2.05	2.12
100	1.55	2.15	2.25
						Figure 9: Comparison of the network lifetime.
