# Supplementary figures and images for: A P2P multi-path routing algorithm based on Skyline operator for data aggregation in IoMT environments
Source: PeerJ journal article supplement (doi:10.7717/peerj-cs.1682), 2023-11-22

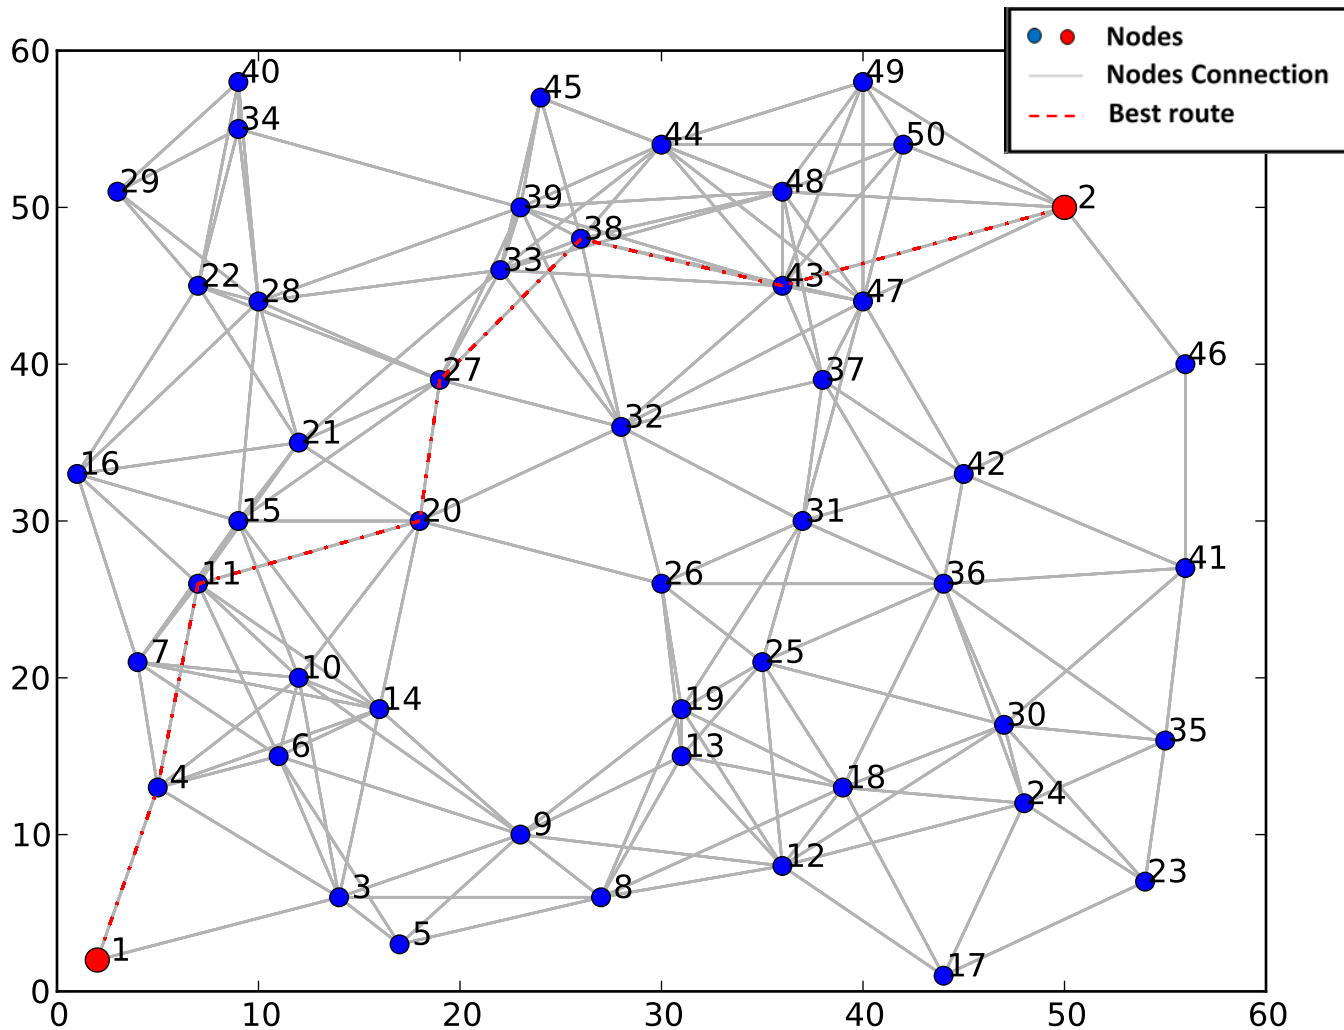

Supplement: Implementation.zip [file Implementation.zip]

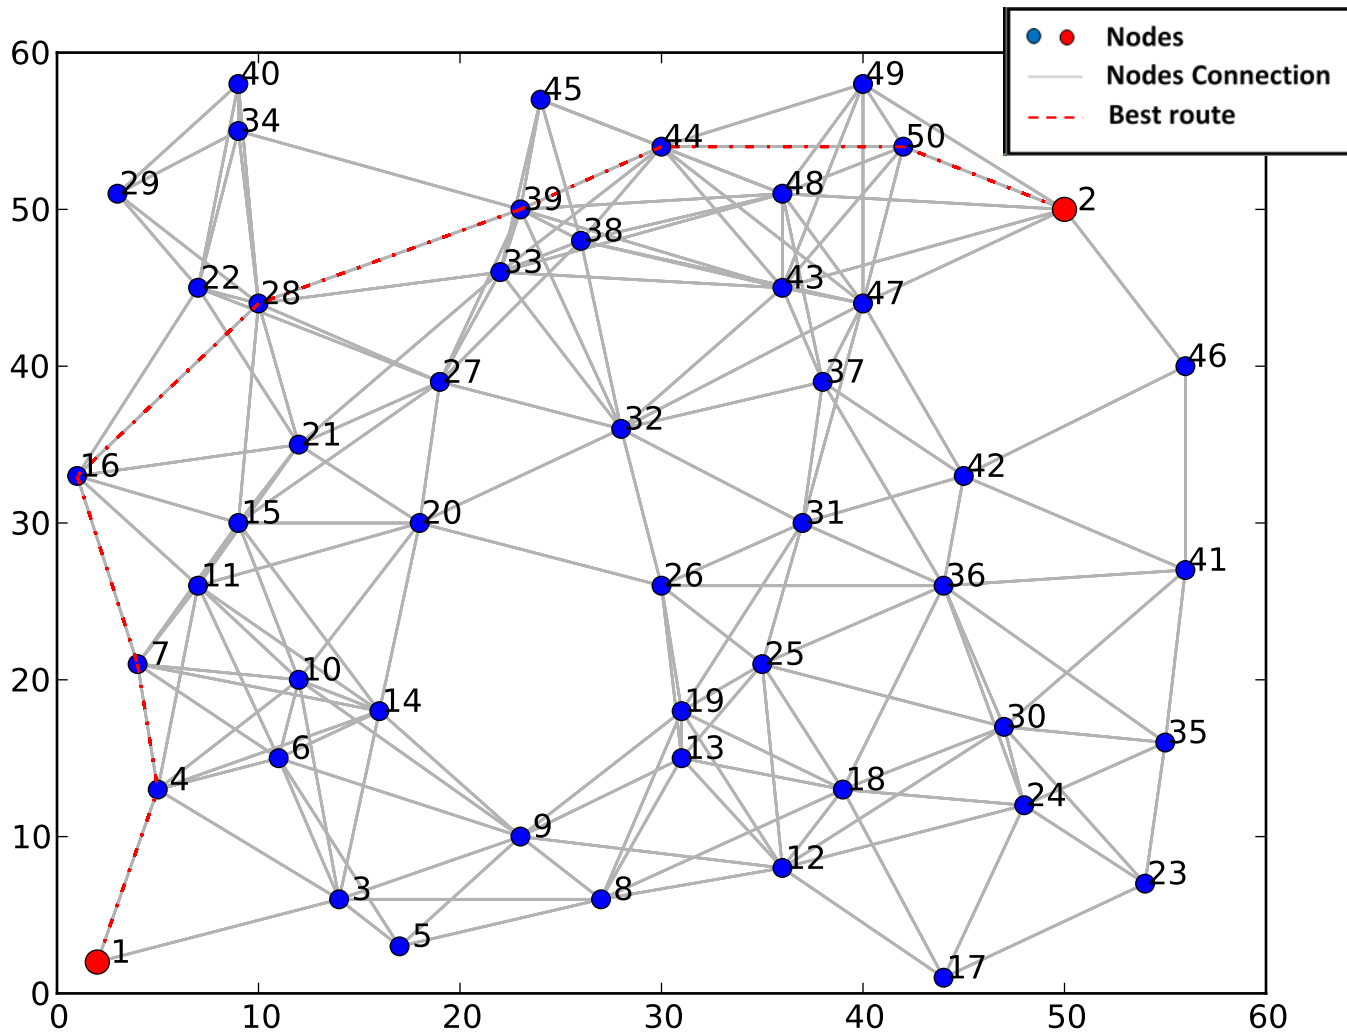

Supplement: Implementation.zip [file Implementation.zip]

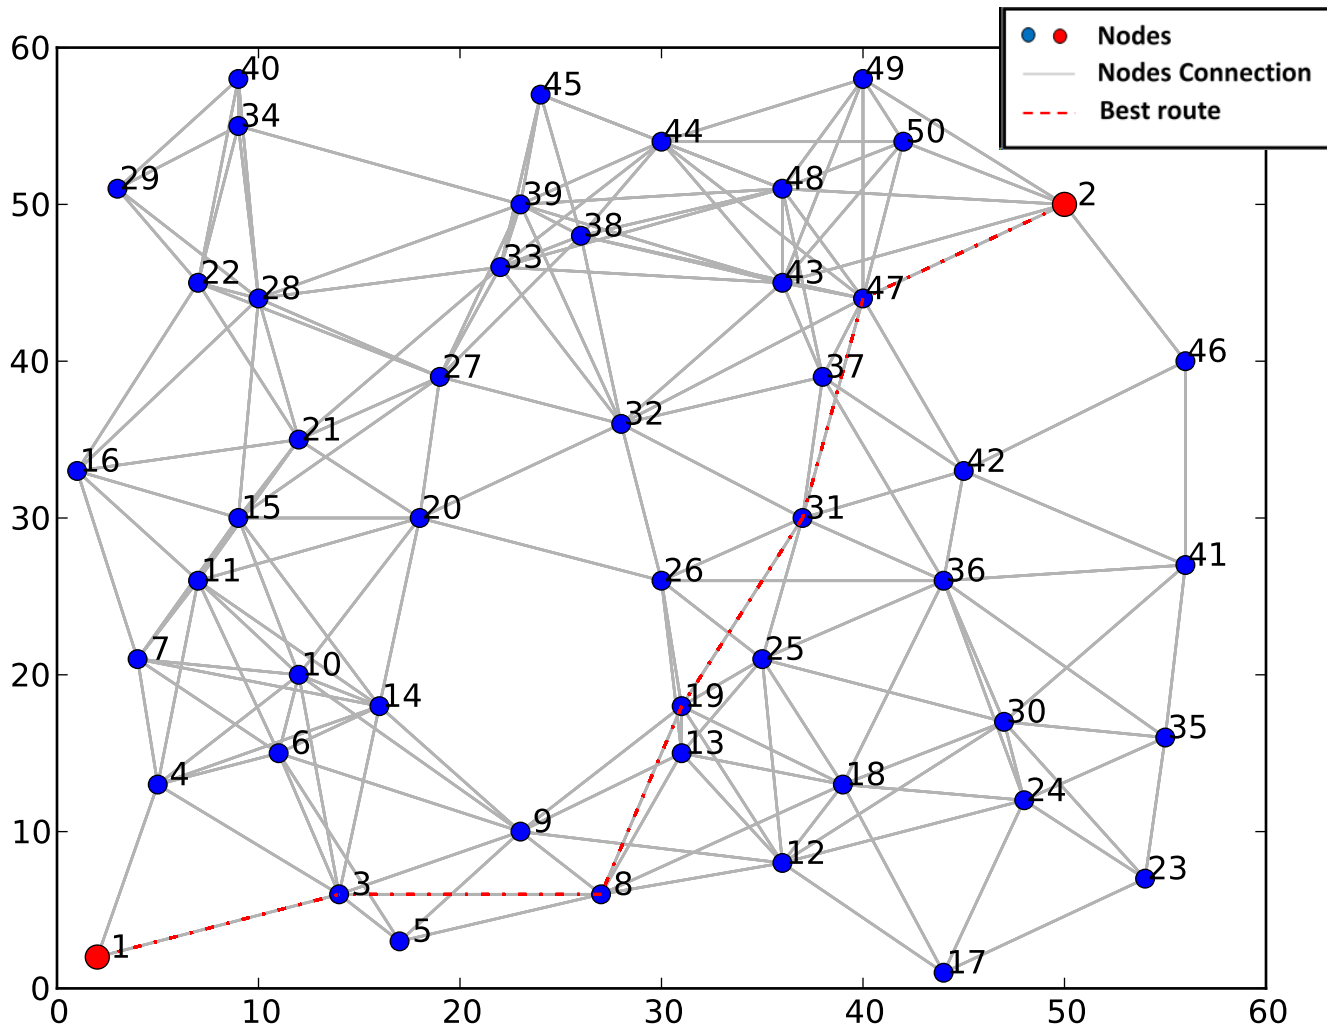

Supplement: Implementation.zip [file Implementation.zip]

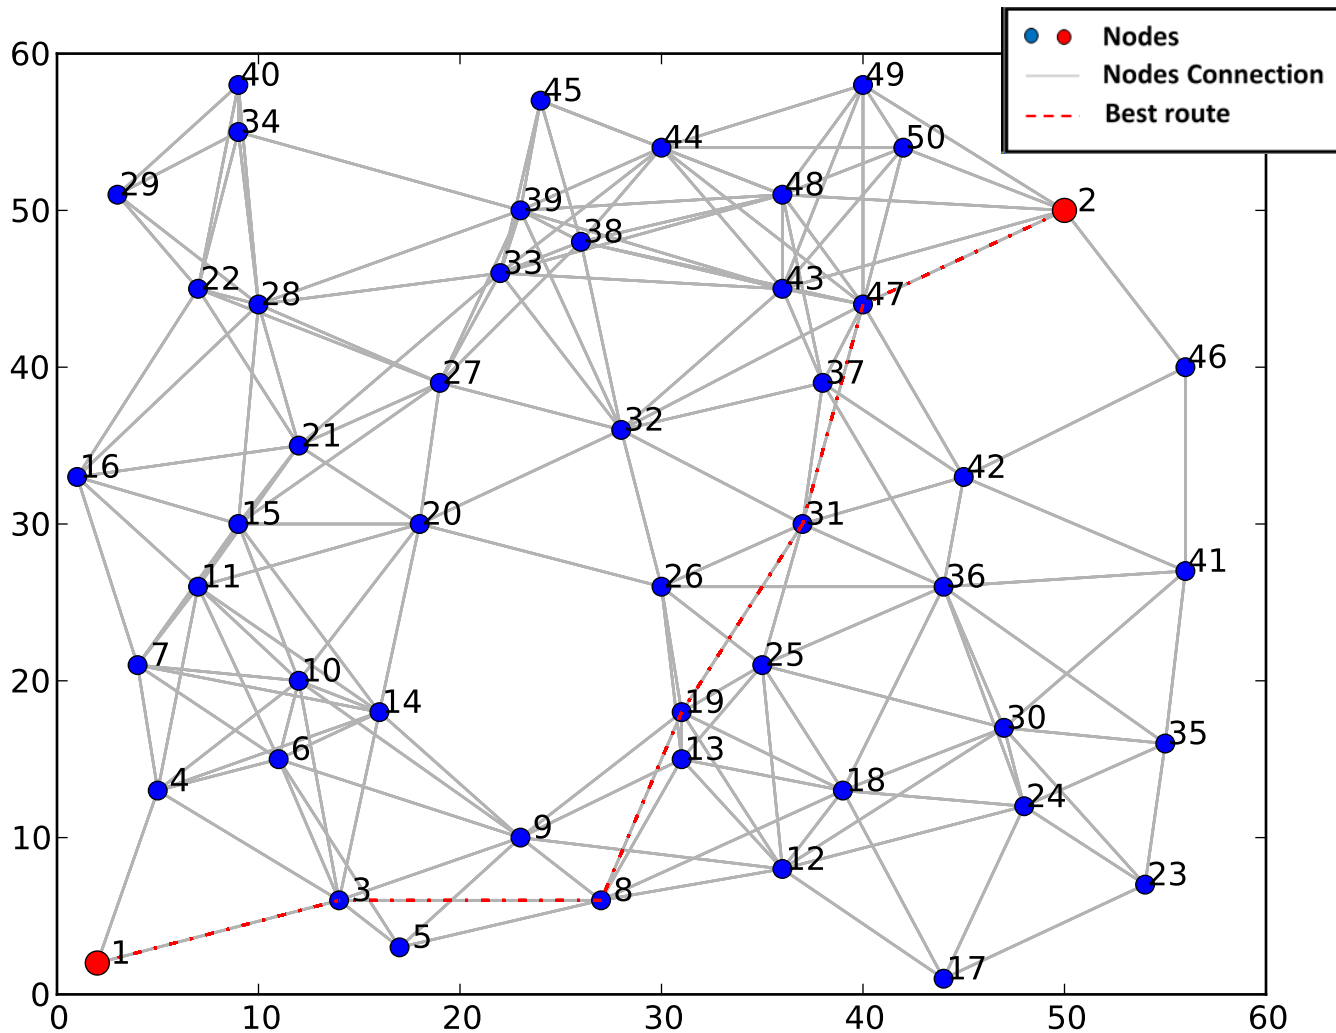

Supplement: Implementation.zip [file Implementation.zip]

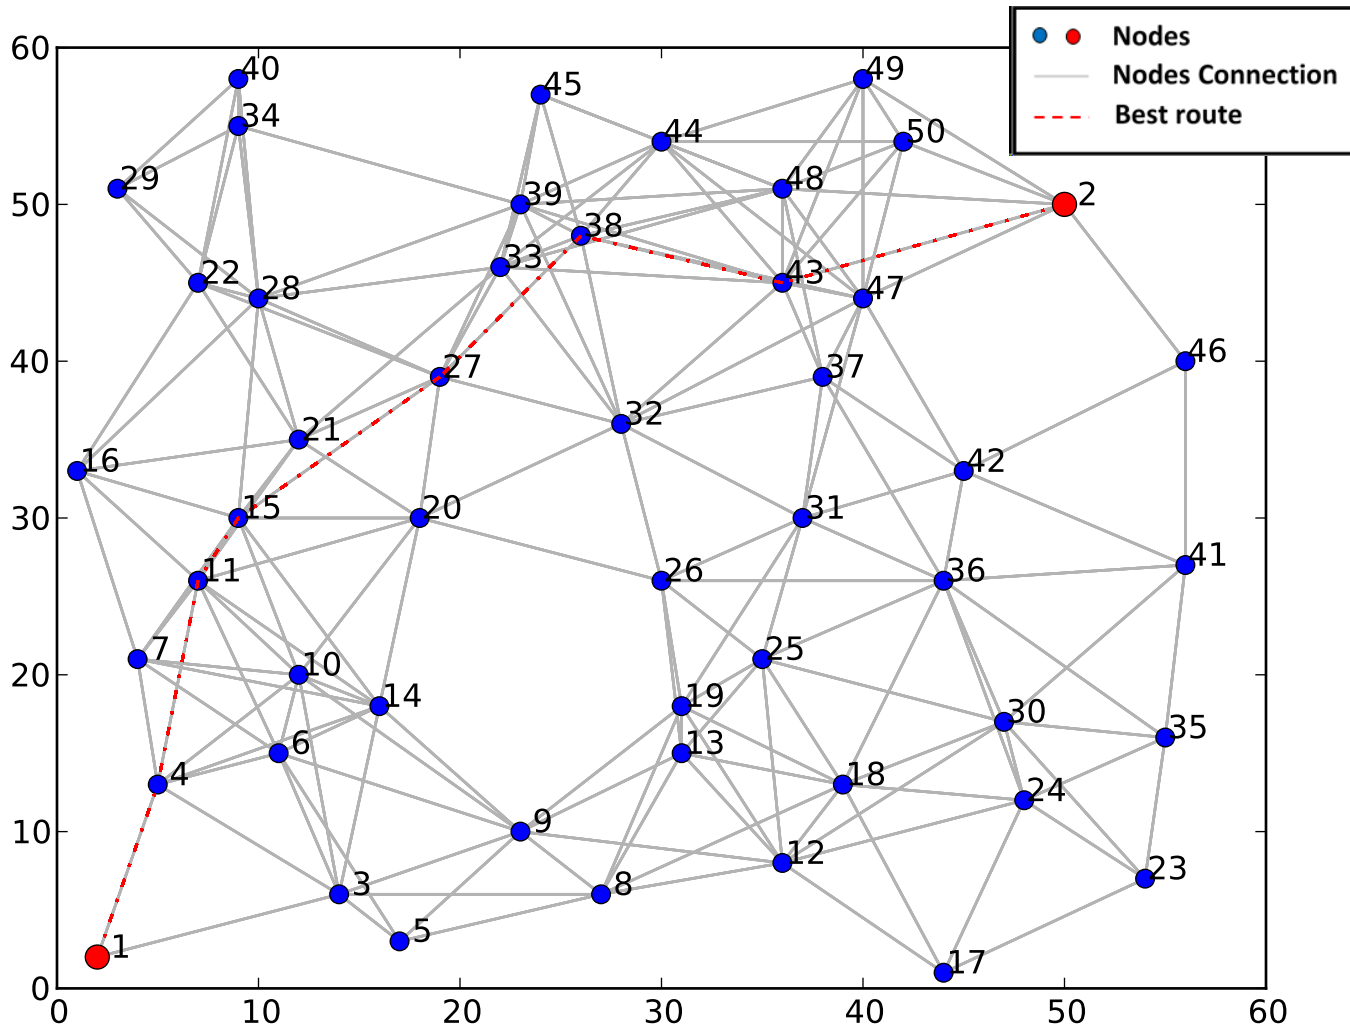

Supplement: Implementation.zip [file Implementation.zip]

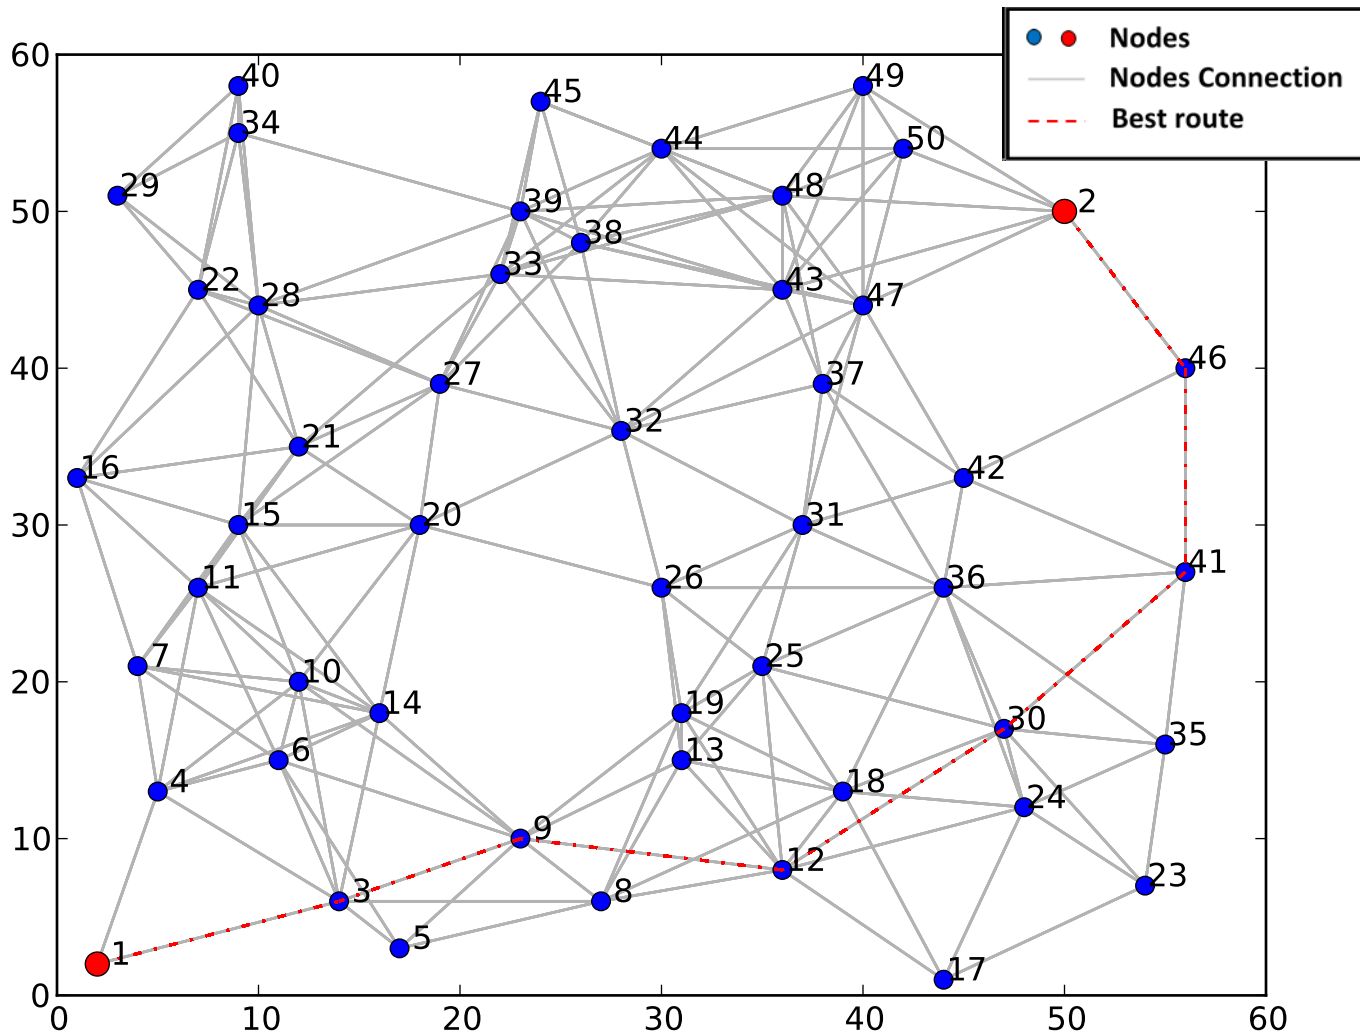

Supplement: Implementation.zip [file Implementation.zip]

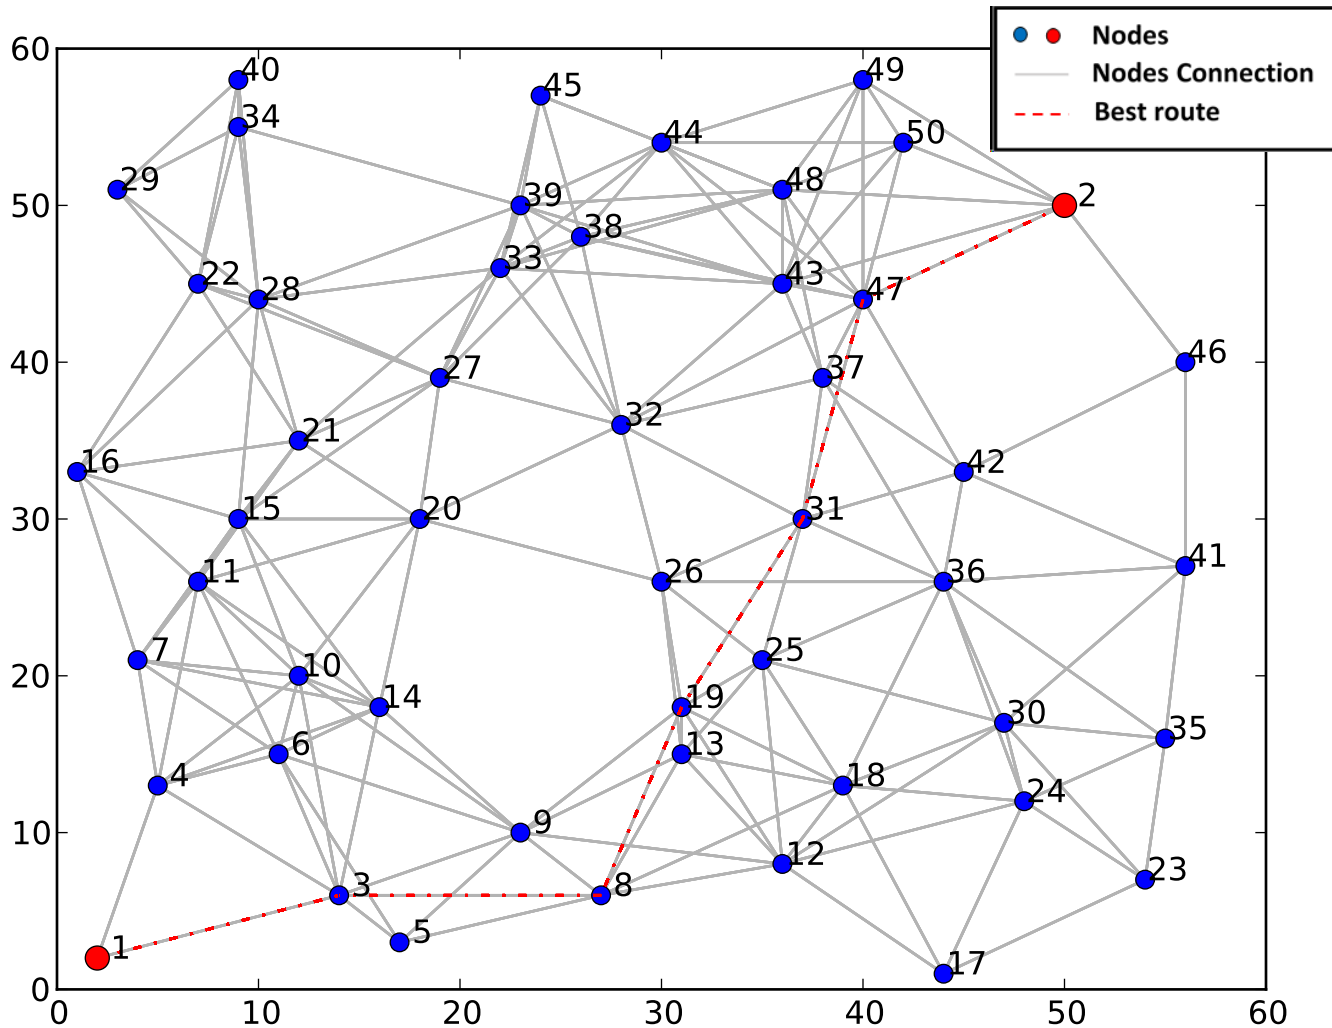

Supplement: Implementation.zip [file Implementation.zip]

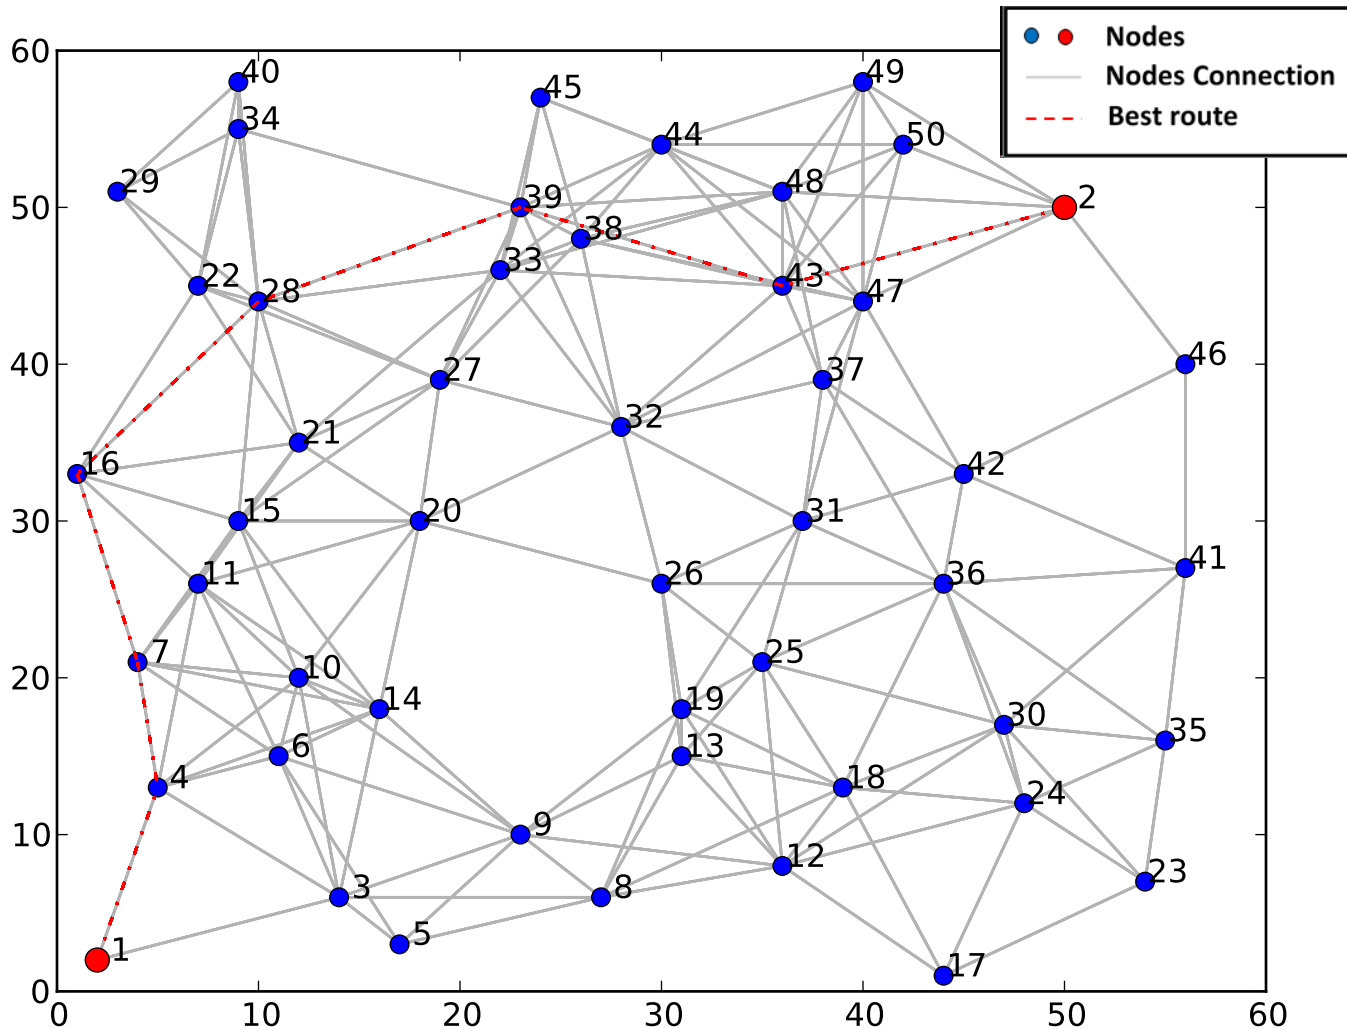

Supplement: Implementation.zip [file Implementation.zip]
